# Supplementary material for: A Multi-site Passive Approach for Studying the Emissions and Evolution of Smoke from Prescribed Fires
Source: Copernicus journal article supplement (doi:10.5194/egusphere-2024-1485), 2024-06-04
Supplement: Supplementary file 1 [file egusphere-2024-1485-supplement.pdf]

1                                   Supplementary Information for

2   **A Multi-site Passive Approach for Studying the**  
3   **Emissions and Evolution of Smoke from Prescribed**  
4   **Fires**

5 Rime El Asmar<sup>1</sup>, Zongrun Li<sup>2</sup>, David J. Tanner<sup>1</sup>, Yongtao Hu<sup>2</sup>, Susan O'Neill<sup>3</sup>, L. Gregory Huey<sup>1</sup>,  
6 M. Talat Odman<sup>2</sup>, Rodney J. Weber<sup>1</sup>

7 <sup>1</sup>Earth and Atmospheric Sciences, Georgia Institute of Technology, Atlanta, 30331, USA.

8 <sup>2</sup>School of Civil and Environmental Engineering, Georgia Institute of Technology, Atlanta, 30331, USA.

9 <sup>3</sup>USDA Forest Service, Pacific Northwest Research Station, 400 North 34th Street, Suite 201, Seattle, WA 98103,  
10 USA.

11  
12 *Correspondence to: Rodney J. Weber ([rweber@eas.gatech.edu](mailto:rweber@eas.gatech.edu))*

13

14 S.1 Example on determining the physical age of smoke average wind vector

15 The first identified smoke event in this work took place on March 23, 2021 and is shown in Figure S6.  
16 Measured PM<sub>2.5</sub> mass, CO, and BC star increasing at 1:00 pm. Based on observed wind direction and  
17 HYSPLIT back trajectories, the source of the smoke was determined as the prescribed fire that took place  
18 on the same day on unit N34 on Fort Moore. The distance from the indicated unit is 8.104 miles at an  
19 azimuth of 130° from the measuring site. The average wind vector during the hour leading to the peak is 4  
20 mph at 132°. This means that it takes more than 1 hour for smoke to be transported across 8.104 miles.  
21 Iteration by averaging the wind vector for the two hours leading to the peak, results in wind vector of  
22 speed 4.5 mph at 131.5°. By dividing the distance by the speed calculated, the age estimated is 108  
23 minutes. Since the calculated age is less than 2 hours, no more iteration is needed.

24

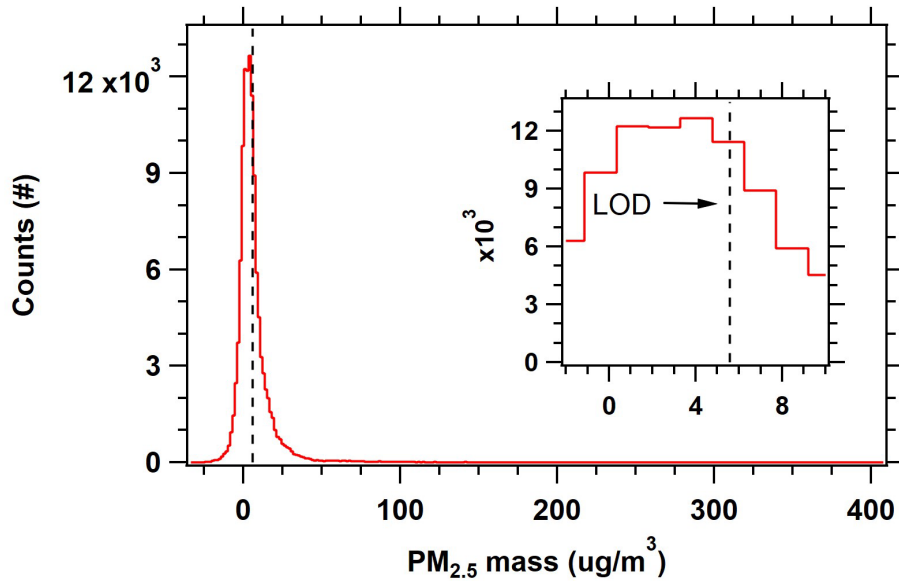

26

27 **Figure S1.** Example frequency distribution of  $\text{PM}_{2.5}$  mass measurements by a TEOM that was installed on  
 28 the main trailer during the 2022 field study at Fort Moore. The data was recorded at a rate of every 60 s.  
 29 The vertical black dotted line is the estimated LOD base based on three times the standard deviation of  
 30 blank measurement. The frequency distribution is conducted with 300 bins and a bin width interval of  
 31  $1.48 \text{ ug m}^{-3}$ . The results illustrate the presence of negative measured masses when averaging over short  
 32 time intervals.

33

34

35

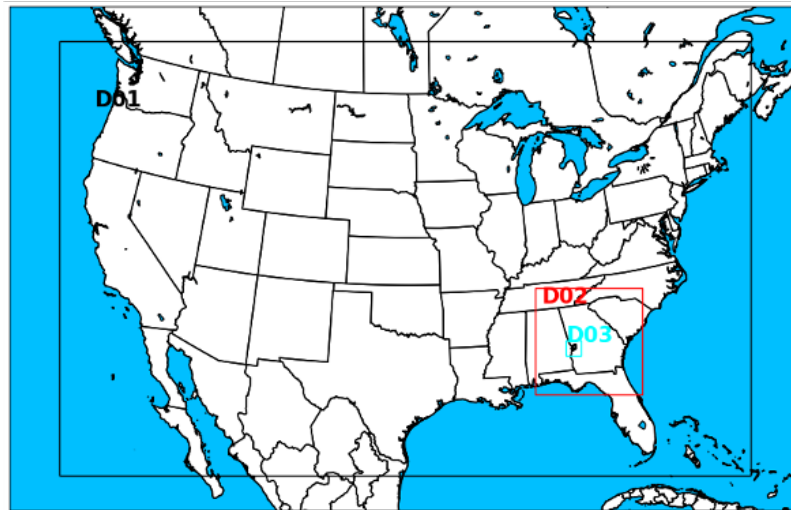

37

38 **Figure S2.**WRF domain settings. North American Mesoscale Forecast System (NAM) 12km (National  
39 Centers for Environmental Prediction, National Weather Service, NOAA, 2015) data are used to provide  
40 initial and boundary conditions for WRF. WRF simulated the meteorological conditions by the one-way  
41 nesting method for 12km (D01), 4km (D02), and 1km (D03) domains. Global surface and upper air  
42 observational weather data (National Centers for Environmental Prediction, National Weather Service,  
43 NOAA, 2004a, b) are used for grid nudging in all three domains and for observational nudging in the 1km  
44 domain. HYSPLIT used 1km domain outputs from WRF.

45

46

47

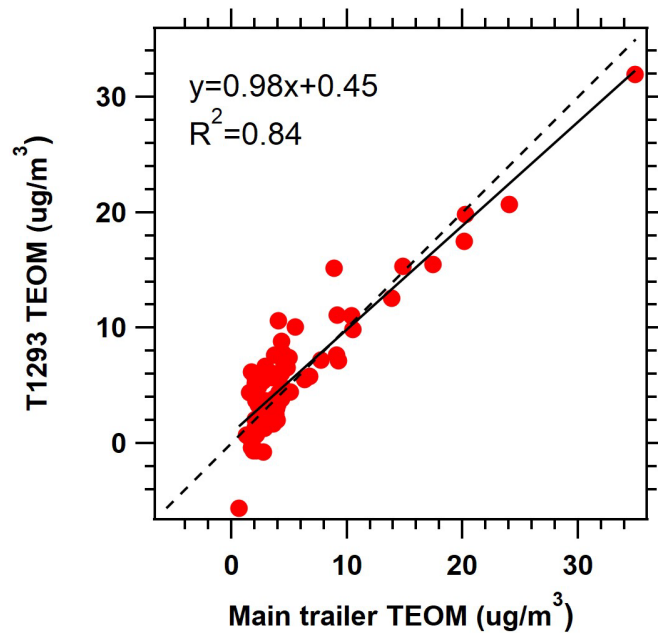

48

49 **Figure S3.** Comparison of PM<sub>2.5</sub> mass concentrations measured by collocated TEOMs (main trailer  
50 TEOM and TEOM in trailer T1293) over a period of 26 hours. The sampling site was Eglin Air Force  
51 Base from March 19, 2023 at 8:00 till March 20, 2023 at 10:00. Slope is from orthogonal distance  
52 regression (ODR) of the 20-minutes averaged data.

53

54

55

56

57

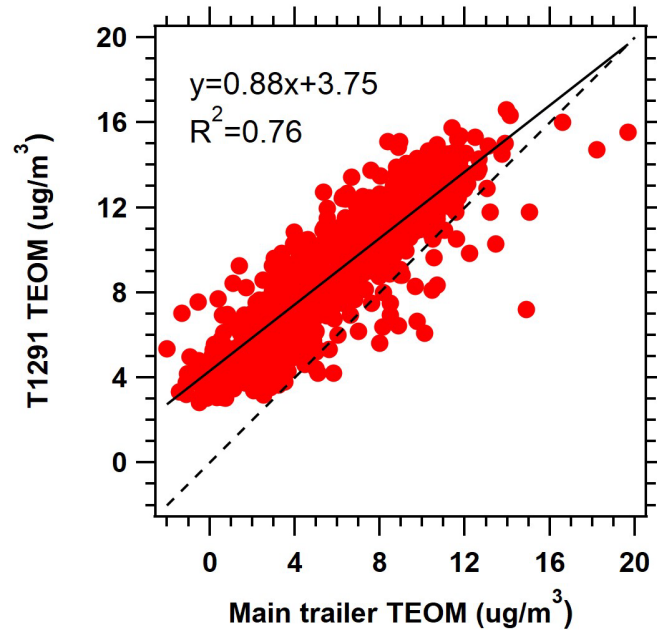

58

59 **Figure S4.** Comparison of PM<sub>2.5</sub> mass concentrations measured by collocated TEOMs (main trailer  
60 TEOM and TEOM in trailer T1291) over a period of 336 hours. The sampling site was Georgia Institute  
61 of Technology, Ford Environmental Science and Technology building from September 22, 2023 at 19:00  
62 till October 7, 2023 at 14:00. Slope is from orthogonal distance regression (ODR) of the 20-minutes  
63 averaged data.

64

65

66

67

68

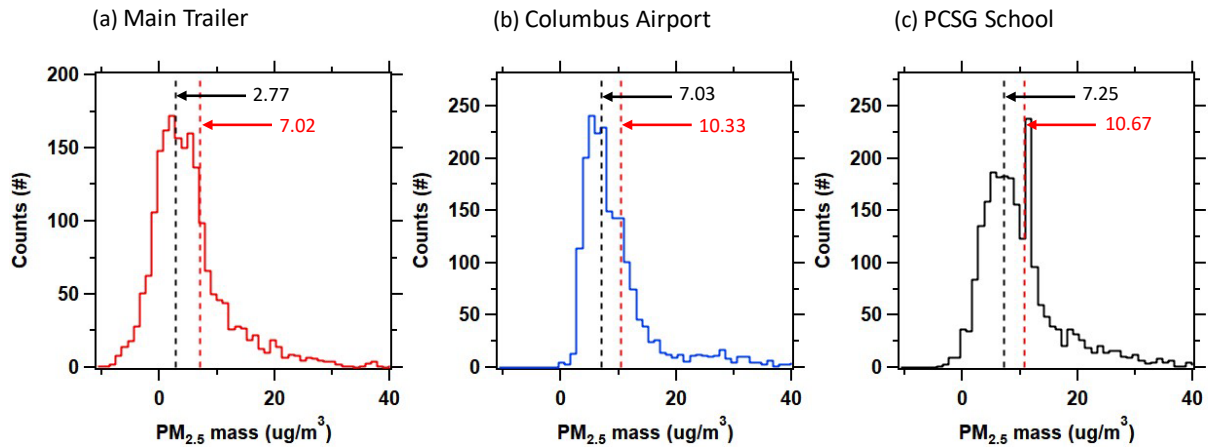

69

70 **Figure S5.** Frequency distribution of PM<sub>2.5</sub> mass measurements taken by the TEOM that was installed in  
71 the main trailer and at the two EPD sites (Columbus airport and PCSG school) in field study of 2022  
72 (February 11, 2022 till May 18, 2022). The data are 60-minutes averages. The vertical black dotted line is  
73 the calculated mean background PM<sub>2.5</sub> at each site. The red vertical dotted line is the mean of all data in  
74 the frequency distribution of each site. The frequency distribution is conducted with 300 bins and a bin  
75 width interval of 1.03 ug m<sup>-3</sup>.

76

77

78

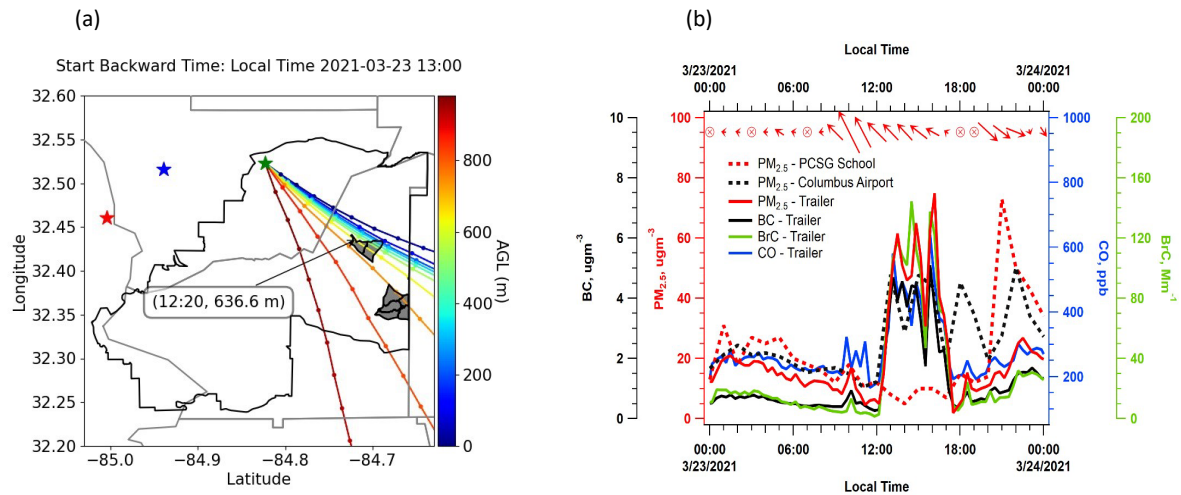

80

81 **Figure S6.** A case study of two prescribed fires reported on the base but not detected on the satellite. (a)  
 82 HYSPLIT back trajectories starting on March 23, 2021 at 13:00. The colors of the trajectories represent  
 83 the height above ground level. Green star marks the location of the main trailer; blue and red stars mark  
 84 Columbus airport and PCSG school EPD sites respectively. Time and height at which the lowest  
 85 trajectory crosses the trailer are shown in the box inside the map. The fires detected on FIRMS would  
 86 have been shown by red dots but there are no detections. Grey shaded Polygons are the boundaries of  
 87 prescribed burns conducted on the Fort based on the fire reports. (b) Time series of species measured on  
 88 main trailer. Time resolution is 20 minutes for CO, PM<sub>2.5</sub> mass, BC, and BrC. Data from PCSG School  
 89 and Columbus Airport are hourly averages. The wind vectors depict hourly data sourced from RAWS,  
 90 with the direction of the arrow indicating wind direction, and the length of the arrow representing wind  
 91 speed.

92

93

94



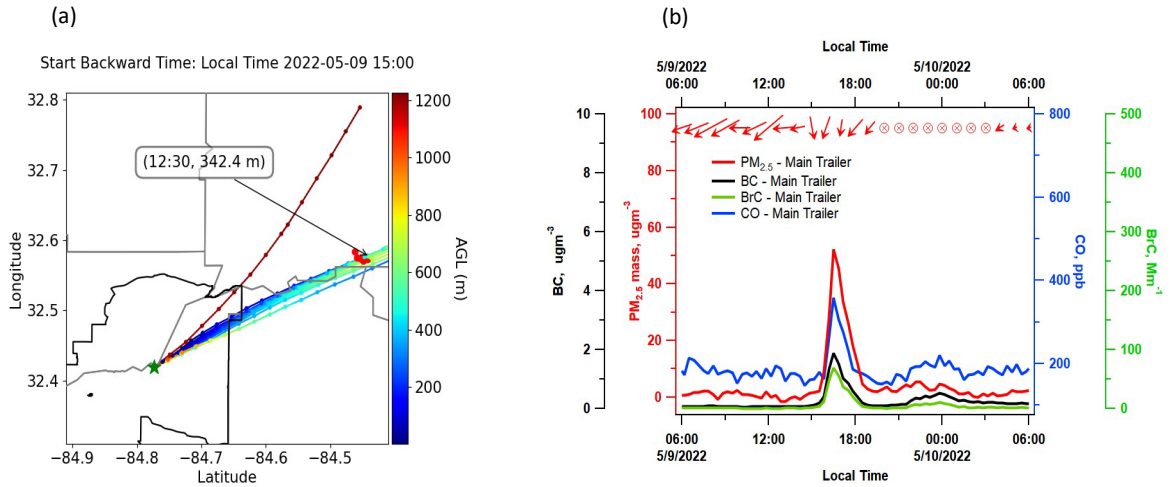

97 **Figure S7.** A case study on the influence of off-base fires on smoke detection within the base. (a)  
 98 HYSPLIT back trajectories starting on May 9, 2022 at 15:00. The colors of the scatter are the height  
 99 above ground level. Green star marks the location of the main trailer. Time and height at which the lowest  
 100 trajectory crosses the trailer are shown in the box inside the map. Red dots are fires detected on FIRMS  
 101 the same day of the backward trajectory (satellite overpass happened on May 9, 2022, at 12:38, 13:54,  
 102 and 14:42). (b) Time series of species measured on main trailer. Time resolution is 20 minutes for CO,  
 103  $PM_{2.5}$  mass, BC, and BrC. The wind vectors depict hourly data sourced from RAWS, with the direction of  
 104 the arrow indicating wind direction, and the length of the arrow representing wind speed.

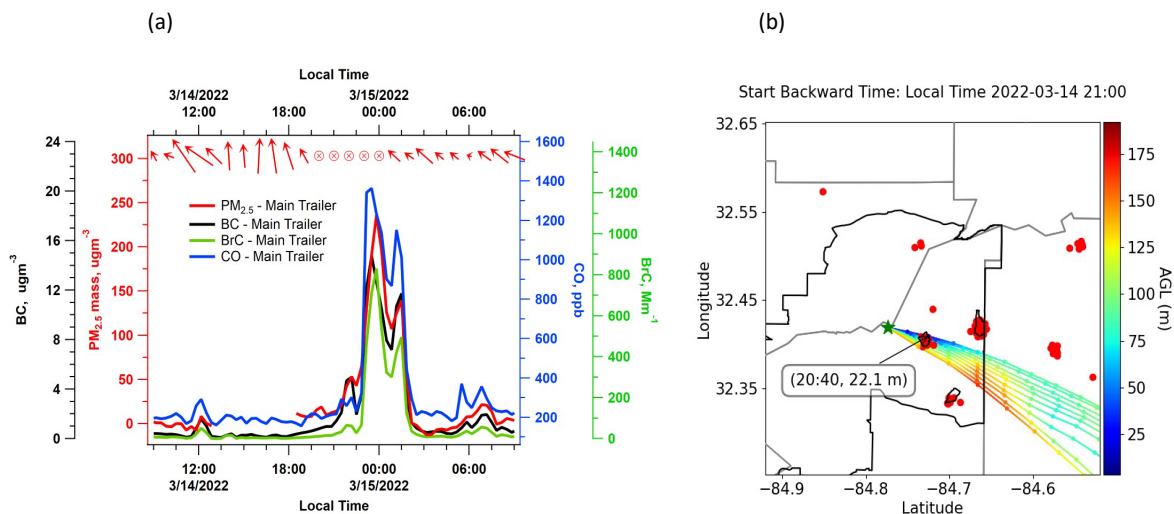

111

112 **Figure S8.** A case study on multiple burns on the same day. (a) Time series of species measured at the  
 113 main trailer. Time resolution is 20 minutes for CO, PM<sub>2.5</sub> mass, BC, and BrC. The wind vectors depict  
 114 hourly data sourced from RAWS, with the direction of the arrow indicating wind direction and the length  
 115 of the arrow representing wind speed. (b) HYSPLIT back trajectories starting on March 14, 2022, at  
 116 21:00. The colors of the scatter are the height above ground level. Green star marks the location of the  
 117 main trailer. Time and height at which the lowest trajectory crosses the trailer are shown in the box inside  
 118 the map. Red dots are fires detected on FIRMS the same day of the backward trajectory (satellite overpass  
 119 happened on March 14, 2022, at 11:51, 13:48, 14:43, and 15:12).

120

121

122

123

124

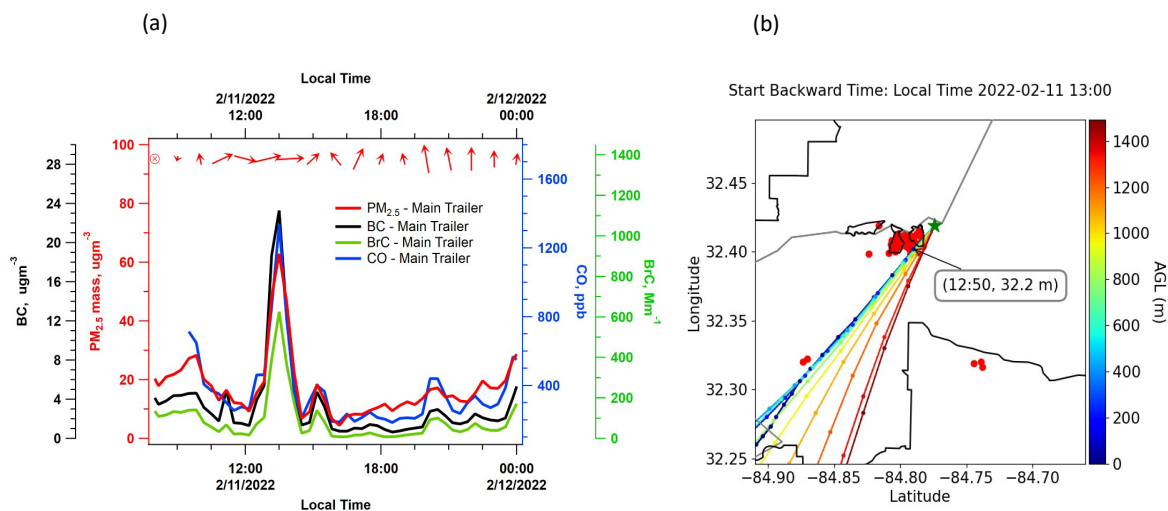

126

127 **Figure S9.** A case study of multiple close burns on the same day. (a) Time series of species measured at  
128 the main trailer. Time resolution is 20 minutes for CO, PM<sub>2.5</sub> mass, BC, and BrC. The wind vectors depict  
129 hourly data sourced from RAWS, with the direction of the arrow indicating wind direction and the length  
130 of the arrow representing wind speed. (b) HYSPLIT back trajectories starting on February 11, 2022 at  
131 13:00. The colors of the scatter are the height above ground level. Green star marks the location of the  
132 main trailer. Time and height at which the lowest trajectory crosses the trailer are shown in the box inside  
133 the map. Red dots are fires detected on FIRMS the same day of the backward trajectory (satellite overpass  
134 happened on February 11, 2022 at 13:19, 13:23, and 14:12).

135

136

137

138

139

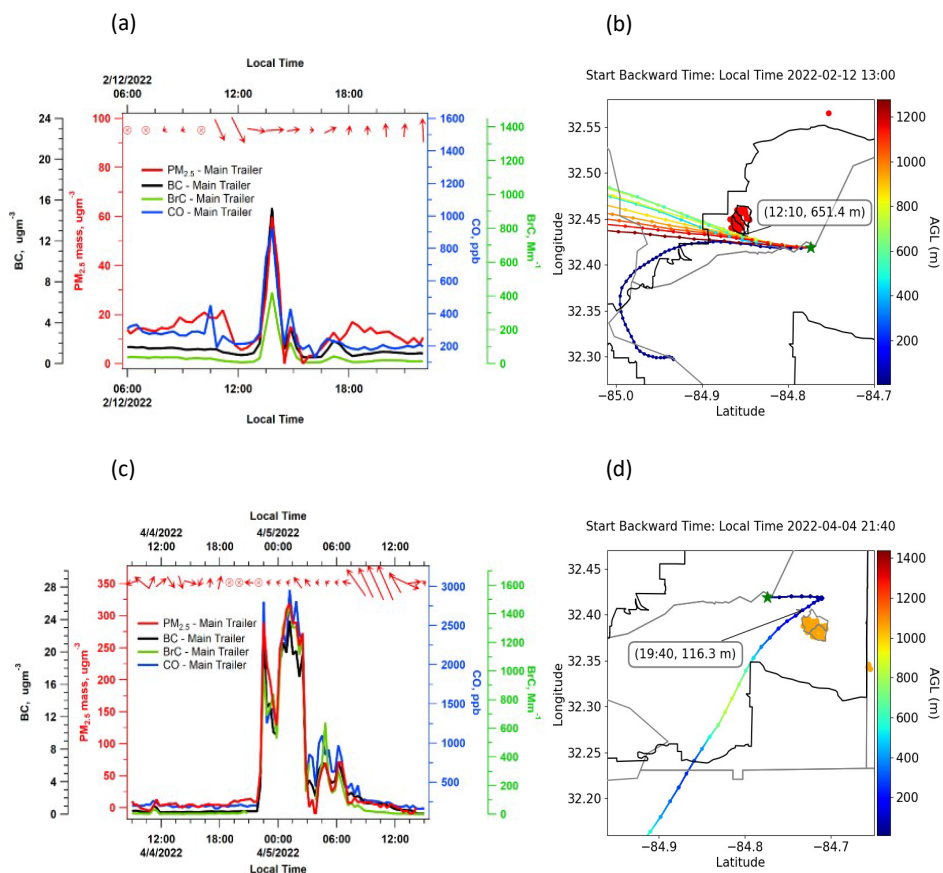

141

142 **Figure S10.** Two case studies with different dispersion conditions and PBL height. (a, b) Time series of  
 143 species measured on main trailer. Time resolution is 20 minutes for CO,  $\text{PM}_{2.5}$  mass, BC, and BrC. The  
 144 wind vectors depict hourly data sourced from RAWS, with the direction of the arrow indicating wind  
 145 direction and the length of the arrow representing wind speed. (b, d) HYSPLIT back trajectories starting  
 146 on February 12, 2022 at 13:00 and April 4, 2022 at 21:40. The colors of the scatter are the height above  
 147 ground level. Green star marks the location of the main trailer. Date and time of the backward trajectory is  
 148 indicated on top of each map. Time and height at which the lowest trajectory crosses the trailer are shown  
 149 in the box inside each map. Red dots are fires detected on FIRMS the same day of the backward trajectory  
 150 (satellite overpass happened on February 12, 2022 at 13:54, 14:01, and on April 4, 2022 at 12:09, 14:49,  
 151 and 15:36).

152

153

154

155

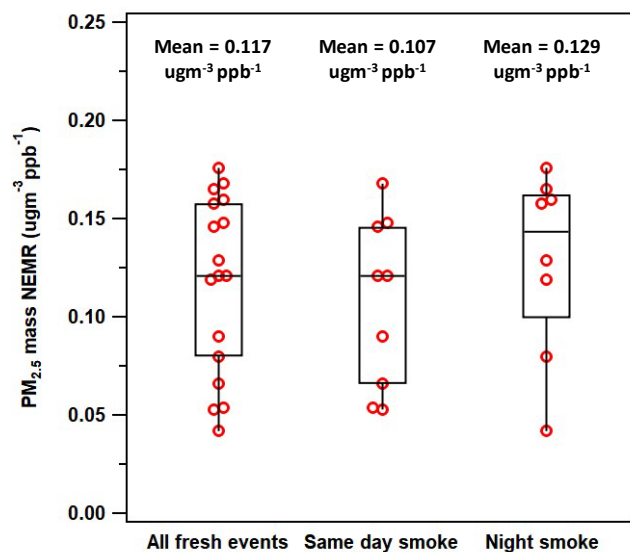

157

158 **Figure S11.** Box plot of PM<sub>2.5</sub> mass NEMRs relative to CO (i.e.,  $\Delta\text{PM}_{2.5} \text{ mass} / \Delta\text{CO}$ ) of i) all fresh smoke  
 159 events in this study, ii) fresh smoke from fires starting on the same day of the measurement, iii) fresh  
 160 smoke from fires starting the day before measurement. The horizontal line inside the box represents the  
 161 median of the data. The top line of the box represents the third quartile (Q3), and the bottom line  
 162 represents the first quartile (Q1). There is no statistical difference between the two groups (two-tailed p  
 163 value is 0.355).

164

165

166

167

168

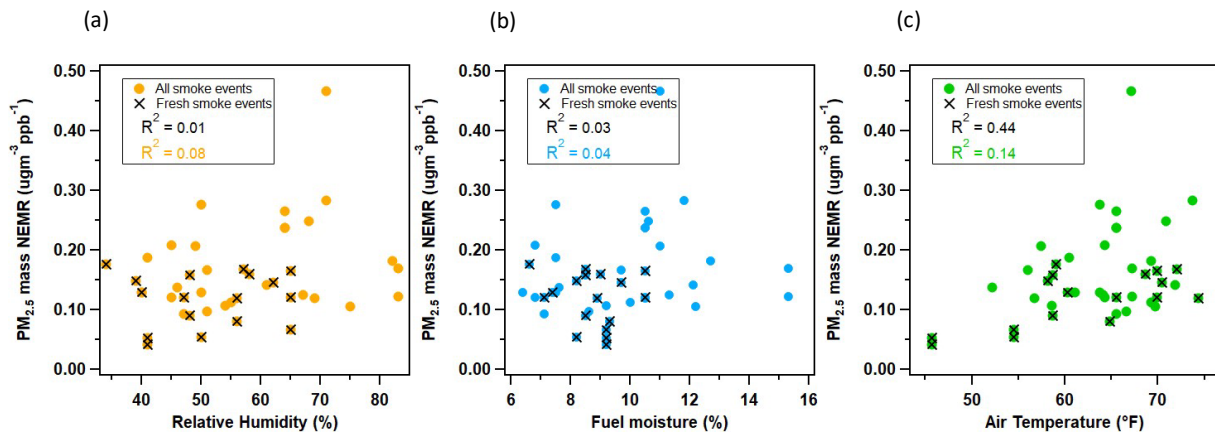

170

171 **Figure S12.** Variability of  $PM_{2.5}$  mass NEMRs as a function of (a) relative humidity, (b) fuel moisture,  
 172 and (c) air temperature. Meteorological data are from Fort Moore RAWS site (Figure 1a). The Pearson's  
 173 correlation coefficients are shown in each plot for all smoke events (colored) and for fresh smoke plumes  
 174 ( $\leq 1$  hr old).

175

176

177

178

179 **Table S1.** Monthly average backgrounds of PM<sub>2.5</sub> mass, BC, and CO concentrations excluding peaks and  
 180 the data 24 hours after each peak at each trailer during 2021 and 2022 field studies.

| Month/Year    | PM <sub>2.5</sub><br>ug/m <sup>3</sup> | CO<br>ppb                 | BC<br>ug/m <sup>3</sup>  |
|---------------|----------------------------------------|---------------------------|--------------------------|
| March 2021    | 4.67 ± 4.04 <sup>a</sup>               | 194.0 ± 41.1 <sup>a</sup> | 0.32 ± 0.28 <sup>a</sup> |
| April 2021    | 3.74 ± 2.45 <sup>a</sup>               | 203.3 ± 31.0 <sup>a</sup> | 0.35 ± 0.19 <sup>a</sup> |
| May 2021      | 2.78 ± 2.61 <sup>b</sup>               | 172.2 ± 23.5 <sup>b</sup> | 0.22 ± 0.18 <sup>b</sup> |
| February 2022 | 3.12 ± 4.59 <sup>c</sup>               | 182.2 ± 32.3 <sup>c</sup> | 0.38 ± 0.30 <sup>c</sup> |
| March 2022    | 2.55 ± 4.70 <sup>c</sup>               | 198.0 ± 26.9 <sup>c</sup> | 0.21 ± 0.16 <sup>c</sup> |
|               | 5.02 ± 2.41 <sup>d</sup>               | 196.7 ± 37.0 <sup>d</sup> | 0.19 ± 0.15 <sup>d</sup> |
|               | 4.80 ± 2.86 <sup>e</sup>               | -                         | 0.31 ± 0.26 <sup>e</sup> |
|               | 6.22 ± 2.02 <sup>f</sup>               | -                         | -                        |
|               | 5.47 ± 2.47 <sup>g</sup>               | -                         | -                        |
| April 2022    | 2.91 ± 4.20 <sup>c</sup>               | 177.7 ± 20.1 <sup>c</sup> | 0.23 ± 0.20 <sup>c</sup> |
|               | 6.11 ± 3.58 <sup>d</sup>               | 191.8 ± 28.8 <sup>d</sup> | 0.57 ± 0.31 <sup>d</sup> |
|               | 6.59 ± 2.79 <sup>e</sup>               | -                         | 0.23 ± 0.17 <sup>e</sup> |
|               | 6.30 ± 3.94 <sup>g</sup>               | -                         | -                        |
| May 2022      | 2.48 ± 2.91 <sup>c</sup>               | 168.5 ± 22.6 <sup>c</sup> | 0.14 ± 0.07 <sup>c</sup> |
|               | 6.27 ± 2.75 <sup>d</sup>               | 152.3 ± 34.7 <sup>d</sup> | 0.26 ± 0.17 <sup>d</sup> |
|               | 6.80 ± 3.20 <sup>e</sup>               | -                         | 0.18 ± 0.08 <sup>e</sup> |
|               | 6.36 ± 3.31 <sup>f</sup>               | 150.8 ± 23.5 <sup>f</sup> | -                        |
|               | 6.10 ± 2.44 <sup>g</sup>               | -                         | -                        |

<sup>a</sup>: trailer was located in the northwest corner of the Fort.

<sup>b</sup>: trailer was relocated to the central area of the Fort.

<sup>c</sup>: average calculated from measurements on the main trailer.

<sup>d</sup>: average calculated from measurements on trailer 1293.

<sup>e</sup>: average calculated from measurements on trailer 1292.

<sup>f</sup>: average calculated from measurements on trailer 1291.

<sup>g</sup>: average calculated from measurements on trailer 1290.

181

182

183 **Table S2.** Monthly average backgrounds of PM<sub>2.5</sub> mass concentrations (ug m<sup>-3</sup>) excluding peaks and the  
 184 data 24 hours after each peak at EPD sites.

|            | Month/Year    | Columbus Airport | Phenix City South Girard (PCSG) School |
|------------|---------------|------------------|----------------------------------------|
| Mean       | 2021          | 8.99 ± 7.16      | 9.59 ± 7.90                            |
|            | 2022          | 10.33 ± 8.70     | 10.67 ± 9.40                           |
| Background | March 2021    | 9.10 ± 4.90      | 7.55 ± 5.21                            |
|            | April 2021    | 6.44 ± 3.43      | 6.77 ± 2.92                            |
|            | May 2021      | 6.40 ± 3.57      | 7.75 ± 3.75                            |
|            | February 2022 | -                | 8.01 ± 5.20                            |
|            | March 2022    | 6.41 ± 3.75      | 6.22 ± 6.21                            |
|            | April 2022    | 7.40 ± 3.50      | 8.03 ± 5.03                            |
|            | May 2022      | 7.29 ± 2.76      | 6.72 ± 3.85                            |

185

186



187 **Table S3.** Observed smoke peaks during the 2021 burning season in Fort Moore, GA, with their  
 188 corresponding maximum values of 20 and 60 minutes averaged PM<sub>2.5</sub> mass and CO concentrations.

| Date                   | PM <sub>2.5</sub> - 20<br>minute max<br>ug m <sup>-3</sup> | PM <sub>2.5</sub> - 60<br>minute max<br>ug m <sup>-3</sup> | CO – 20 minute<br>max<br>ppb | CO – 60 minute<br>max<br>ppb |
|------------------------|------------------------------------------------------------|------------------------------------------------------------|------------------------------|------------------------------|
| 3/23/2021              | 74.8                                                       | 54.7                                                       | 638.4                        | 509.3                        |
| 3/30/2021              | 35.6                                                       | 34.1                                                       | -                            | -                            |
| 4/06/2021              | 74.9                                                       | 66.9                                                       | 772.7                        | 707.6                        |
| 4/07/2021              | 182.0                                                      | 131.8                                                      | 1184.6                       | 964.3                        |
| 4/08/2021              | 46.8                                                       | 43.9                                                       | 507.1                        | 505.9                        |
| 4/13/2021              | 39.0                                                       | 37.1                                                       | -                            | -                            |
| 4/14/2021              | 44.9                                                       | 28.8                                                       | 377.2                        | 275.8                        |
| 4/20/2021              | 69.9                                                       | 50.7                                                       | 1072.6                       | 690.9                        |
| 4/21/2021<br>(2 peaks) | 118.5<br>2129.2 <sup>a</sup>                               | 65.4<br>1408.2 <sup>a</sup>                                | 1159.0<br>6260.4             | 925.4<br>6142.5              |
| 4/30/2021              | 46.8                                                       | 39.9                                                       | 551.5                        | 500.7                        |

<sup>a</sup>: Filter was clogged due to a nearby fire and direct hit of smoke.

189

190

191 **Table S4.** Observed smoke peaks during the 2022 burning season in Fort Moore, GA, at the Main Trailer,  
 192 with their corresponding maximum values of 20 and 60 minutes averaged PM<sub>2.5</sub> mass and CO  
 193 concentrations.

| Date                   | PM <sub>2.5</sub> – 20<br>minute max<br>ug m <sup>-3</sup> | PM <sub>2.5</sub> – 60<br>minute max<br>ug m <sup>-3</sup> | CO – 20 minute<br>max<br>ppb | CO – 60 minute<br>max<br>ppb |
|------------------------|------------------------------------------------------------|------------------------------------------------------------|------------------------------|------------------------------|
| 2/11/2022              | 62.8                                                       | 52.5                                                       | 1336.6                       | 972.0                        |
| 2/12/2022              | 60.0                                                       | 33.0                                                       | 926.4                        | 650.5                        |
| 2/13/2022<br>(2peaks)  | 50.0<br>41.4                                               | 43.9<br>36.4                                               | 1041.4<br>1482.7             | 999.5<br>1069.7              |
| 2/26/2022              | 274.8                                                      | 204.7                                                      | 1344.2                       | 1220.3                       |
| 2/27/2022              | 46.6                                                       | 31.2                                                       | 456.4                        | 360.7                        |
| 3/01/2022              | 122.8                                                      | 105.6                                                      | 966.4                        | 747.7                        |
| 3/02/2022              | 118.3                                                      | 89.7                                                       | 1046.5                       | 762.1                        |
| 3/04/2022<br>(2 peaks) | 38.4<br>100.4                                              | 28.8<br>79.9                                               | 411.8<br>947.1               | 352.2<br>715.0               |
| 3/05/2022              | 37.2                                                       | 28.0                                                       | 399.0                        | 319.1                        |
| 3/07/2022<br>(2 peaks) | 64.4<br>45.2                                               | 57.3<br>35.9                                               | 583.9<br>429.7               | 503.8<br>396.6               |
| 3/14/2022              | 236.0                                                      | 185.6                                                      | 1362.9                       | 1312.9                       |
| 3/25/2022              | 52.2                                                       | 45.6                                                       | 596.6                        | 454.8                        |
| 3/29/2022              | 141.0                                                      | 100.5                                                      | 1145.0                       | 855.6                        |

---

|           |       |       |        |        |
|-----------|-------|-------|--------|--------|
| 4/04/2022 | 319.2 | 298.9 | 2960.1 | 2765.3 |
| 4/25/2022 | 60.7  | 50.7  | 394.7  | 323.5  |
| 5/09/2022 | 52.3  | 42.0  | 358.9  | 349.0  |

---

194

195

196 **Table S5.** Observed smoke peaks during the 2022 burning season in Fort Moore, GA, at Trailer 1293,  
 197 with their corresponding maximum values of 20 and 60 minutes averaged PM<sub>2.5</sub> mass and CO  
 198 concentrations.

| Date                   | PM <sub>2.5</sub> – 20<br>minute max<br>ug m <sup>-3</sup> | PM <sub>2.5</sub> – 60<br>minute max<br>ug m <sup>-3</sup> | CO – 20 minute<br>max<br>ppb | CO – 60 minute<br>max<br>ppb |
|------------------------|------------------------------------------------------------|------------------------------------------------------------|------------------------------|------------------------------|
| 3/21/2022              | 104.6                                                      | 87.2                                                       | 715.5                        | 644.4                        |
| 3/25/2022              | 52.9                                                       | 33.7                                                       | 455.3                        | 344.0                        |
| 3/26/2022              | 841.4                                                      | 513.0                                                      | 6044.5                       | 3554.7                       |
| 3/27/2022              | 170.8                                                      | 141.2                                                      | 1091.8                       | 966.1                        |
| 3/28/2022              | 80.7                                                       | 42.5                                                       | 875.1                        | 692.4                        |
| 3/29/2022              | 128.2                                                      | 64.3                                                       | 1574.4                       | 887.9                        |
| 4/05/2022              | 35.59                                                      | 32.6                                                       | 286.0                        | 269.6                        |
| 4/21/2022              | 39.8                                                       | 32.1                                                       | 228.5                        | 214.2                        |
| 4/23/2022<br>(2 peaks) | 73.2<br>317.7                                              | 51.2<br>246.5                                              | 515.1<br>2104.9              | 348.4<br>1678.8              |
| 4/24/2022              | 133.1                                                      | 123.9                                                      | 662.1                        | 611.1                        |
| 4/26/2022              | 58.9                                                       | 53.0                                                       | 415.1                        | 383.6                        |
| 5/09/2022              | 40.2                                                       | 34.7                                                       | 311.4                        | 288.7                        |
| 5/10/2022              | 65.2                                                       | 43.5                                                       | 650.9                        | 562.1                        |
| 5/11/2022              | 147.6                                                      | 104.2                                                      | 826.4                        | 711.9                        |

|                        |       |       |        |        |
|------------------------|-------|-------|--------|--------|
| 5/12/2022 <sup>a</sup> | 511.9 | 311.0 | 5108.2 | 2926.9 |
|                        | 506.2 | 444.5 | 4903.3 | 4381.4 |

---

<sup>a</sup>: Levels stayed high for 6 hours and had two maxima.

---

199

200

201 **Table S6.** Observed smoke peaks during 2022 burning season in Fort Moore, GA, at Trailer 1292, with  
 202 their corresponding maximum values of 20 and 60 minutes averaged PM<sub>2.5</sub> mass concentrations.

| Date                   | PM <sub>2.5</sub> – 20 minute max<br>ug m <sup>-3</sup> | PM <sub>2.5</sub> - hourly max<br>ug m <sup>-3</sup> |
|------------------------|---------------------------------------------------------|------------------------------------------------------|
| 3/21/2022              | 63.4                                                    | 60.6                                                 |
| 3/22/2022              | 38.0                                                    | 27.7                                                 |
| 3/26/2022              | 52.5                                                    | 49.0                                                 |
| 3/27/2022<br>(2 peaks) | 126.8<br>119.2                                          | 94.5<br>97.4                                         |
| 3/28/2022              | 117.4                                                   | 108.9                                                |
| 3/29/2022              | 165.2                                                   | 142.1                                                |
| 3/30/2022              | 37.4                                                    | 34.4                                                 |
| 4/11/2022              | 44.9                                                    | 28.1                                                 |
| 4/25/2022              | 64.4                                                    | 45.2                                                 |
| 4/29/2022              | 55.7                                                    | 37.7                                                 |
| 5/9/2022               | 52.8                                                    | 42.3                                                 |
| 5/10/2022              | 35.8                                                    | 29.0                                                 |

203

204

205 **Table S7.** Observed smoke peaks during the 2022 burning season in Fort Moore, GA, at Trailer 1291,  
 206 with their corresponding maximum values of 20 and 60 minutes averaged PM<sub>2.5</sub> mass and CO  
 207 concentrations.

208

| Date      | PM <sub>2.5</sub> - 20<br>minute max<br>ug m <sup>-3</sup> | PM <sub>2.5</sub> - hourly<br>max<br>ug m <sup>-3</sup> | CO -20 minute<br>max<br>ppb | CO - hourly<br>max<br>ppb |
|-----------|------------------------------------------------------------|---------------------------------------------------------|-----------------------------|---------------------------|
| 3/21/2022 | 51.2                                                       | 34.6                                                    |                             |                           |
| 3/27/2022 | 119.9                                                      | 109.4                                                   |                             |                           |
| 3/28/2022 | 159.4                                                      | 118.4                                                   |                             |                           |
| 3/29/2022 | 101.4                                                      | 69.0                                                    |                             |                           |
| 5/09/2022 | 69.2                                                       | 56.5                                                    | 427.8                       | 356.2                     |

209

210

211 **Table S8.** Satellite overpasses during the three smoke episodes shown in Figure 5.

212

213

214

215

216

217

218

219

220

221

222

| Hotspot | Time of Satellite overpass | Satellite          |
|---------|----------------------------|--------------------|
| a, b    | 4/05/2021 11:52            | Modis/Terra        |
| a, b    | 4/05/2021 14:24            | VIRS375m/Suomi NPP |
| a, b, c | 4/05/2021 15:07            | Modis/Aqua         |
| a, b, c | 4/05/2021 15:12            | VIRS375/NOAA-20    |
| d, e, f | 4/06/2021 12:35            | Modis/Terra        |
| d, e, f | 4/06/2021 14:00            | VIRS375m/Suomi NPP |
| d, e    | 4/06/2021 14:12            | Modis/Aqua         |
| d, e, f | 4/06/2021 14:54            | VIRS375/NOAA-20    |
| g       | 4/07/2021 11:39            | Modis/Terra        |
| g       | 4/07/2021 14:36            | VIRS375/NOAA-20    |
| g       | 4/07/2021 14:55            | Modis/Aqua         |
| g       | 4/07/2021 15:24            | VIRS375m/Suomi NPP |

223 **Table S9.** Age estimates of identified smoke events using average wind vector and HYSPLIT model.

| Date                   | Site         | Source Identification Method | Age – using average wind vector | Age – HYSPLIT back trajectory |
|------------------------|--------------|------------------------------|---------------------------------|-------------------------------|
| 3/23/2021              | Main Trailer | Methods agree                | 1 hr 48 min                     | 40 min                        |
| 3/30/2021              | Main Trailer | HYSPLIT                      | -                               | 2 hr 30 min                   |
| 4/06/2021              | Main Trailer | Methods agree                | 1 hr 15 min                     | 2 hr 10 min                   |
| 4/07/2021              | Main Trailer | Methods agree                | 14 min                          | 10 min                        |
| 4/08/2021              | Main Trailer | Methods agree                | 162 min                         | 40 min                        |
| 4/13/2021              | Main Trailer | Methods agree                | -                               | 20 min                        |
| 4/14/2021              | Main Trailer | Methods agree                | 44 min                          | 20 min                        |
| 4/20/2021              | Main Trailer | Methods agree                | Few minutes                     | 10 min                        |
| 4/21/2021<br>(2 peaks) | Main Trailer | Methods disagree             | 5 hr 30 min                     | 3 hr 10 min                   |
| 4/30/2021              | Main Trailer | Methods agree                | Few minutes                     | 10 min                        |
|                        | Main Trailer | Unidentified                 | -                               | -                             |
| 2/11/2022              | Main Trailer | Methods agree                | 8 min                           | 10 min                        |
| 2/12/2022              | Main Trailer | Methods agree                | 60 min                          | 50 min                        |
| 2/13/2022<br>(2 peaks) | Main Trailer | Methods agree                | 26 min                          | 20 min                        |
|                        | Main Trailer | Methods agree                | 30 min                          | 20 min                        |
| 2/26/2022              | Main Trailer | Methods disagree             | 2 hr 10 min                     | 1 hr 50 min                   |
| 2/27/2022              | Main Trailer | Methods disagree             | Residual/high background        | Residual/high background      |
| 3/01/2022              | Main Trailer | Methods disagree             | 1 hr 32 min                     | 4 hr 30 min                   |



---

|                        |              |                  |             |             |
|------------------------|--------------|------------------|-------------|-------------|
| 3/02/2022              | Main Trailer | Methods agree    | 60 min      | 40 min      |
| 3/04/2022<br>(2 peaks) | Main Trailer | HYSPLIT          | -           | 2 hr 40 min |
|                        | Main Trailer | HYSPLIT          | -           | 40 min      |
| 3/05/2022              | Main Trailer | Unidentified     | -           | -           |
| 3/07/2022<br>(2 peaks) | Main Trailer | Wind vector      | 224 min     | -           |
|                        | Main Trailer | HYSPLIT          | -           | 10 min      |
| 3/14/2022              | Main Trailer | HYSPLIT          | -           | 20 min      |
| 3/25/2022              | Main Trailer | Methods agree    | Few minutes | 10 min      |
| 3/29/2022              | Main Trailer | Methods agree    | Few minutes | 10 min      |
| 4/04/2022              | Main Trailer | Methods agree    | 2 hr 48 min | 2hr 10min   |
| 4/25/2022              | Main Trailer | Methods agree    | 2 hr 49 min | 1hr 30 min  |
| 5/09/2022              | Main Trailer | Methods agree    | 5 hr 30 min | 2 hr 30 min |
| 3/21/2022              | T1293        | Methods agree    | 1 hr 29 min | 20 min      |
| 3/25/2022              | T1293        | Methods agree    | 45 min      | 30 min      |
| 3/26/2022              | T1293        | Methods agree    | Few minutes | 10 min      |
| 3/27/2022              | T1293        | Methods agree    | Few minutes | 10 min      |
| 3/28/2022              | T1293        | Methods agree    | -           | 60 min      |
| 3/29/2022              | T1293        | Methods disagree | -           | 3 hr 30 min |
| 4/05/2022              | T1293        | HYSPLIT          | -           | 6 hr        |
| 4/21/2022              | T1293        | Wind vector      | 78 min      | -           |

---

---

|                        |       |                  |             |             |
|------------------------|-------|------------------|-------------|-------------|
| 4/23/2022<br>(2 peaks) | T1293 | Methods agree    | 28 min      | 10 min      |
|                        |       | Methods agree    | 48 min      | 10 min      |
| 4/24/2022              | T1293 | Methods agree    | 63 min      | 40 min      |
| 4/26/2022              | T1293 | Wind vector      | 1 hr 46 min | -           |
| 5/09/2022              | T1293 | Methods agree    | 8 hr        | 3 hr 30 min |
| 5/10/2022              | T1293 | Methods agree    | 7 hr 54 min | 2 hr 40 min |
| 5/11/2022              | T1293 | Methods agree    | Few minutes | 10 min      |
| 5/12/2022              | T1293 | Methods agree    | Few minutes | 10 min      |
| 3/21/2022              | T1292 | Methods agree    | -           | 60 min      |
| 3/22/2022              | T1292 | HYSPLIT          | -           | 40 min      |
| 3/26/2022              | T1292 | Methods agree    | 45 min      | 30 min      |
| 3/27/2022<br>(2 peaks) | T1292 | Methods agree    | 36 min      | 20 min      |
|                        | T1292 | Methods agree    | 1 hr 27 min | 20 min      |
| 3/28/2022              | T1292 | Methods agree    | 10 min      | 20 min      |
| 3/29/2022              | T1292 | Methods disagree | 59 min      | 20 min      |
| 3/30/2022              | T1292 | Methods agree    | 1 hr 18 min | 20 min      |
| 4/11/2022              | T1292 | Wind vector      | 1 hr 19 min | -           |
| 4/25/2022              | T1292 | Methods agree    | 3 hr 37 min | 1 hr 50 min |
| 4/29/2022              | T1292 | Unidentified     | -           | -           |
| 5/09/2022              | T1292 | Methods agree    | 4hr 56 min  | 2 hr 40 min |

---

---

|           |       |                  |             |             |
|-----------|-------|------------------|-------------|-------------|
| 5/10/2022 | T1292 | Wind vector      | 1 hr 25 min | -           |
| 3/21/2022 | T1291 | Methods agree    | 3 hr 42 min | 1 hr 20 min |
| 3/27/2022 | T1291 | Methods agree    | 63 min      | 30 min      |
| 3/28/2022 | T1291 | Methods agree    | 54 min      | 2 hr 10 min |
| 3/29/2022 | T1291 | Methods disagree | 1 hr 18 min | 40 min      |
| 5/09/2022 | T1291 | Methods agree    | 4 hr 26 min | 1 hr 30 min |

---

224

225

226

227 **Table S10.** PM<sub>2.5</sub> mass NEMRs ( $\mu\text{g m}^{-3}$  ppb<sup>-1</sup>) from other studies used in the comparison conducted with  
 228 our findings.

| Study                                         | PM <sub>2.5</sub> mass<br>NEMR<br>( $\mu\text{g m}^{-3}$ ppb <sup>-1</sup> ) | Platform used | Type                                                                                  | Estimated Age as<br>reported |
|-----------------------------------------------|------------------------------------------------------------------------------|---------------|---------------------------------------------------------------------------------------|------------------------------|
| (Alves et al.,<br>2010) <sup>a</sup>          | 0.121                                                                        | Ground        | Prescribed fires/<br>shrub-dominant<br>forests with some<br>pine trees in<br>Portugal | Fresh                        |
| (Desservettaz et<br>al., 2017) <sup>a,b</sup> | 0.069                                                                        | Ground        | Prescribed fires/<br>tropical savanna<br>forests in<br>Australia                      | 1 min                        |
|                                               | 0.037                                                                        |               |                                                                                       | 10 min                       |
|                                               | 0.080                                                                        |               |                                                                                       | 10 min                       |
|                                               | 0.103                                                                        |               |                                                                                       | 20 min                       |
| (Korontzi et al.,<br>2003)                    | 0.084                                                                        | Ground        | Prescribed fires/<br>grassland<br>ecosystems in<br>southern Africa                    | Fresh                        |
|                                               | 0.075                                                                        |               |                                                                                       |                              |
|                                               | 0.077                                                                        |               |                                                                                       |                              |
|                                               | 0.069                                                                        |               |                                                                                       |                              |
|                                               | 0.097                                                                        |               |                                                                                       |                              |
|                                               | 0.114                                                                        |               |                                                                                       |                              |
|                                               | 0.108                                                                        |               |                                                                                       |                              |
|                                               | 0.102                                                                        |               |                                                                                       |                              |
|                                               | 0.091                                                                        |               |                                                                                       |                              |
|                                               | 0.106                                                                        |               |                                                                                       |                              |
|                                               | 0.151                                                                        |               |                                                                                       |                              |
| (Balachandran et<br>al., 2013) <sup>a</sup>   | 0.186                                                                        | Ground        | Prescribed fires/<br>grass and longleaf<br>pine ecosystems<br>in Georgia              | 30-105 min                   |
| (Sinha et al.,<br>2003) <sup>c</sup>          | 0.200                                                                        | Airborne      | Prescribed fires/<br>savanna forests in<br>southern Africa                            | Few min                      |
| (Yokelson et al.,<br>2011) <sup>a</sup>       | 0.111                                                                        | Airborne      | Prescribed fires/<br>crop residues and<br>savanna fires in<br>Mexico                  | Few min                      |
|                                               | 0.065                                                                        |               |                                                                                       |                              |
|                                               | 0.126                                                                        |               |                                                                                       |                              |
|                                               | 0.075                                                                        |               |                                                                                       |                              |
|                                               | 0.094                                                                        |               |                                                                                       |                              |
|                                               | 0.054                                                                        |               |                                                                                       |                              |
|                                               | 0.121                                                                        |               |                                                                                       |                              |
| 0.062                                         |                                                                              |               |                                                                                       |                              |
| (Yokelson et al.,<br>2009) <sup>a</sup>       | 0.094                                                                        | Airborne      | Prescribed fires/<br>deforestation and<br>crop residues on<br>Yucatan peninsula       | 10-30 min                    |
|                                               | 0.054                                                                        |               |                                                                                       | 10-30 min                    |
|                                               | 0.121                                                                        |               |                                                                                       | 10-30 min                    |
|                                               | 0.062                                                                        |               |                                                                                       | 10-30 min                    |
|                                               | 0.074                                                                        |               |                                                                                       | 10-30 min                    |
|                                               | 0.072                                                                        |               |                                                                                       | 10-30 min                    |
|                                               | 0.039                                                                        |               |                                                                                       | 10-30 min                    |
|                                               | 0.073                                                                        |               |                                                                                       | 10-30 min                    |
|                                               | 0.051                                                                        |               |                                                                                       | 10-30 min                    |
| 0.057                                         | 10-30 min                                                                    |               |                                                                                       |                              |

|                                     |       |          |                                                                                                        |                 |
|-------------------------------------|-------|----------|--------------------------------------------------------------------------------------------------------|-----------------|
|                                     | 0.080 |          |                                                                                                        | 10-30 min       |
|                                     | 0.084 |          |                                                                                                        | 10-30 min       |
|                                     | 0.072 |          |                                                                                                        | 10-30 min       |
|                                     | 0.070 |          |                                                                                                        | Several hours   |
|                                     | 0.073 |          |                                                                                                        | Several hours   |
|                                     | 0.062 |          |                                                                                                        | Several hours   |
| (Akagi et al., 2012) <sup>a,d</sup> | 0.090 | Airborne | Prescribed fires/<br>chaparral forests<br>in California                                                | Fresh           |
| (Burling et al., 2011) <sup>a</sup> | 0.167 | Airborne | Prescribed fires/<br>chaparral and oak<br>savanna<br>ecosystems in<br>southwestern US                  | Fresh           |
|                                     | 0.149 |          |                                                                                                        |                 |
|                                     | 0.160 |          |                                                                                                        |                 |
|                                     | 0.399 |          |                                                                                                        |                 |
|                                     | 0.167 |          |                                                                                                        |                 |
|                                     | 0.225 |          |                                                                                                        |                 |
|                                     | 0.221 |          |                                                                                                        |                 |
|                                     | 0.118 |          |                                                                                                        |                 |
|                                     | 0.123 |          |                                                                                                        |                 |
|                                     | 0.091 |          |                                                                                                        |                 |
|                                     | 0.130 |          |                                                                                                        |                 |
|                                     | 0.092 |          |                                                                                                        |                 |
|                                     | 0.114 |          |                                                                                                        |                 |
| (May et al., 2014) <sup>a,b</sup>   | 0.115 | Airborne | Prescribed fires/<br>chaparral and<br>montane<br>ecosystems in CA;<br>coastal plain<br>ecosystem in SC | Fresh           |
|                                     | 0.043 |          |                                                                                                        |                 |
|                                     | 0.055 |          |                                                                                                        |                 |
| (May et al., 2015) <sup>b,e</sup>   | 0.031 | Airborne | Prescribed fires/<br>South Carolina                                                                    | Fresh           |
|                                     | 0.045 |          |                                                                                                        |                 |
| (Liu et al., 2017) <sup>a,f</sup>   | 0.427 | Airborne | Wildfires/ western<br>US                                                                               | < 20 min<br>1 h |
|                                     | 0.307 |          |                                                                                                        | 20 min – 2 h    |
|                                     | 0.298 |          |                                                                                                        |                 |
| (Palm et al., 2020) <sup>b</sup>    | 0.250 | Airborne | Wildfires/ western<br>US                                                                               | 1 h             |
| (Collier et al., 2016) <sup>b</sup> | 0.210 | Airborne | Wildfires/<br>northwest US                                                                             | 1 h             |
|                                     | 0.270 |          |                                                                                                        | 1 h             |
|                                     | 0.240 |          |                                                                                                        | 1 h             |
|                                     | 0.240 |          |                                                                                                        | 1 h             |
|                                     | 0.320 |          |                                                                                                        | 1 h             |
|                                     | 0.390 |          |                                                                                                        | 1 h             |
|                                     | 0.330 |          |                                                                                                        | 1 h             |
|                                     | 0.310 |          |                                                                                                        | 1 h             |
|                                     | 0.260 |          |                                                                                                        | 1 h             |
|                                     | 0.170 |          |                                                                                                        | 2 h             |
|                                     | 0.290 |          |                                                                                                        | 4 h             |
|                                     | 0.370 |          |                                                                                                        | 3 h             |
|                                     | 0.290 |          |                                                                                                        | 3 h             |
|                                     | 0.250 |          |                                                                                                        | 3 h             |

|                                            |       |          |                                                 |         |
|--------------------------------------------|-------|----------|-------------------------------------------------|---------|
| (Gkatzelis et al.,<br>2024) <sup>a,g</sup> | 0.421 | Airborne | Western US                                      | 21 min  |
|                                            | 0.194 |          | wildfires.                                      | 10 min  |
|                                            | 0.142 |          | Understory;                                     | 29 min  |
|                                            | 0.228 |          | Savanna;                                        | 43 min  |
|                                            | 0.159 |          | Shrubland;                                      | 25 min  |
|                                            | 0.331 |          | Grassland; Forest                               | 15 min  |
|                                            | 0.524 |          | land                                            | 102 min |
|                                            | 0.398 |          |                                                 | 65 min  |
|                                            | 0.391 |          |                                                 | 104 min |
|                                            | 0.178 |          |                                                 | 91 min  |
|                                            | 0.204 |          |                                                 | 25 min  |
|                                            | 0.463 |          |                                                 | 153 min |
|                                            | 0.244 |          |                                                 | 27 min  |
|                                            | 0.039 |          |                                                 | 20 min  |
|                                            | 0.462 | Airborne | Eastern US<br>prescribed fire of<br>forest land | 10 min  |

229 <sup>a</sup>:  $\Delta\text{PM}_{2.5}/\Delta\text{CO}$  reported in  $\text{g g}^{-1}$  was converted to  $\mu\text{g m}^{-3} \text{ppb}^{-1}$  through division by 24.45/molar mass of  
230 CO ( $28.01 \text{ g mol}^{-1}$ )

231 <sup>b</sup>: values correspond to  $\Delta\text{OA}/\Delta\text{CO}$

232 <sup>c</sup>: values correspond to  $\Delta\text{PM}_4/\Delta\text{CO}$

233 <sup>d</sup>: values correspond to  $(\text{OA}/\text{CO}_2 \text{ in } \text{g g}^{-1})/(\text{CO}/\text{CO}_2 \text{ in } \text{g g}^{-1})$ . Molar ratio of CO/CO<sub>2</sub> (mol/mol) was  
234 converted to mass ratio ( $\text{g g}^{-1}$ ) by multiplying by molar mass of CO ( $28.01 \text{ g mol}^{-1}$ )/molar mass of CO<sub>2</sub>  
235 ( $44.01 \text{ g mol}^{-1}$ )

236 <sup>e</sup>: values were inferred from the box plots in Figures 2 and 3 for the freshest smoke measured

237 <sup>f</sup>: values correspond to  $\Delta\text{PM}_1/\Delta\text{CO}$

238 <sup>g</sup>: values correspond to  $(\text{OA} + \text{particulate nitrate} + \text{particulate ammonium} + \text{BC})/\text{CO}$

239

240

241 **References**

- 242 Akagi, S. K., Craven, J. S., Taylor, J. W., McMeeking, G. R., Yokelson, R. J., Burling, I. R., Urbanski, S.  
243 P., Wold, C. E., Seinfeld, J. H., Coe, H., Alvarado, M. J., and Weise, D. R.: Evolution of trace gases and  
244 particles emitted by a chaparral fire in California, *Atmos. Chem. Phys.*, 12, 1397–1421,  
245 <https://doi.org/10.5194/acp-12-1397-2012>, 2012.
- 246 Alves, C. A., Gonçalves, C., Pio, C. A., Mirante, F., Caseiro, A., Tarelho, L., Freitas, M. C., and Viegas,  
247 D. X.: Smoke emissions from biomass burning in a Mediterranean shrubland, *Atmos. Environ.*, 44, 3024–  
248 3033, <https://doi.org/10.1016/j.atmosenv.2010.05.010>, 2010.
- 249 Balachandran, S., Pachon, J. E., Lee, S., Oakes, M. M., Rastogi, N., Shi, W., Tagaris, E., Yan, B., Davis,  
250 A., Zhang, X., Weber, R. J., Mulholland, J. A., Bergin, M. H., Zheng, M., and Russell, A. G.: Particulate  
251 and gas sampling of prescribed fires in South Georgia, USA, *Atmos. Environ.*, 81, 125–135,  
252 <https://doi.org/10.1016/j.atmosenv.2013.08.014>, 2013.
- 253 Burling, I. R., Yokelson, R. J., Akagi, S. K., Urbanski, S. P., Wold, C. E., Griffith, D. W. T., Johnson, T.  
254 J., Reardon, J., and Weise, D. R.: Airborne and ground-based measurements of the trace gases and  
255 particles emitted by prescribed fires in the United States, *Atmos. Chem. Phys.*, 11, 12197–12216,  
256 <https://doi.org/10.5194/acp-11-12197-2011>, 2011.
- 257 Collier, S., Zhou, S., Onasch, T. B., Jaffe, D. A., Kleinman, L., Sedlacek, A. J., Briggs, N. L., Hee, J.,  
258 Fortner, E., Shilling, J. E., Worsnop, D., Yokelson, R. J., Parworth, C., Ge, X., Xu, J., Butterfield, Z.,  
259 Chand, D., Dubey, M. K., Pekour, M. S., Springston, S., and Zhang, Q.: Regional Influence of Aerosol  
260 Emissions from Wildfires Driven by Combustion Efficiency: Insights from the BBOP Campaign,  
261 *Environ. Sci. Technol.*, 50, 8613–8622, <https://doi.org/10.1021/acs.est.6b01617>, 2016.
- 262 Desservettaz, M., Paton-Walsh, C., Griffith, D. W. T., Kettlewell, G., Keywood, M. D., Vanderschoot, M.  
263 V., Ward, J., Mallet, M. D., Milic, A., Miljevic, B., Ristovski, Z. D., Howard, D., Edwards, G. C., and  
264 Atkinson, B.: Emission factors of trace gases and particles from tropical savanna fires in Australia, *J.*  
265 *Geophys. Res. Atmos.*, 122, 6059–6074, <https://doi.org/10.1002/2016JD025925>, 2017.
- 266 Gkatzelis, G. I., Coggon, M. M., Stockwell, C. E., Hornbrook, R. S., Allen, H., Apel, E. C., Bela, M. M.,  
267 Blake, D. R., Bourgeois, I., Brown, S. S., Campuzano-Jost, P., St. Clair, J. M., Crawford, J. H., Crouse,  
268 J. D., Day, D. A., DiGangi, J. P., Diskin, G. S., Fried, A., Gilman, J. B., Guo, H., Hair, J. W., Halliday, H.  
269 S., Hanisco, T. F., Hannun, R., Hills, A., Huey, L. G., Jimenez, J. L., Katich, J. M., Lamplugh, A., Lee, Y.  
270 R., Liao, J., Lindaas, J., McKeen, S. A., Mikoviny, T., Nault, B. A., Neuman, J. A., Nowak, J. B.,  
271 Pagonis, D., Peischl, J., Perring, A. E., Piel, F., Rickly, P. S., Robinson, M. A., Rollins, A. W., Ryerson,  
272 T. B., Schueneman, M. K., Schwantes, R. H., Schwarz, J. P., Sekimoto, K., Selimovic, V., Shingler, T.,  
273 Tanner, D. J., Tomsche, L., Vasquez, K. T., Veres, P. R., Washenfelder, R., Weibring, P., Wennberg, P.  
274 O., Wisthaler, A., Wolfe, G. M., Womack, C. C., Xu, L., Ball, K., Yokelson, R. J., and Warneke, C.:  
275 Parameterizations of US wildfire and prescribed fire emission ratios and emission factors based on  
276 FIREX-AQ aircraft measurements, *Atmos. Chem. Phys.*, 24, 929–956, [https://doi.org/10.5194/acp-24-](https://doi.org/10.5194/acp-24-929-2024)  
277 [929-2024](https://doi.org/10.5194/acp-24-929-2024), 2024.
- 278 Korontzi, S., Ward, D. E., Susott, R. A., Yokelson, R. J., Justice, C. O., Hobbs, P. V., Smithwick, E. A.  
279 H., and Hao, W. M.: Seasonal variation and ecosystem dependence of emission factors for selected trace  
280 gases and PM 2.5 for southern African savanna fires, *J. Geophys. Res. Atmos.*, 108,  
281 <https://doi.org/10.1029/2003JD003730>, 2003.
- 282 Liu, X., Huey, L. G., Yokelson, R. J., Selimovic, V., Simpson, I. J., Müller, M., Jimenez, J. L.,  
283 Campuzano-Jost, P., Beyersdorf, A. J., Blake, D. R., Butterfield, Z., Choi, Y., Crouse, J. D., Day, D. A.,  
284 Diskin, G. S., Dubey, M. K., Fortner, E., Hanisco, T. F., Hu, W., King, L. E., Kleinman, L., Meinardi, S.,  
285 Mikoviny, T., Onasch, T. B., Palm, B. B., Peischl, J., Pollack, I. B., Ryerson, T. B., Sachse, G. W.,

286 Sedlacek, A. J., Shilling, J. E., Springston, S., St. Clair, J. M., Tanner, D. J., Teng, A. P., Wennberg, P.  
287 O., Wisthaler, A., and Wolfe, G. M.: Airborne measurements of western U.S. wildfire emissions:  
288 Comparison with prescribed burning and air quality implications, *J. Geophys. Res. Atmos.*, 122, 6108–  
289 6129, <https://doi.org/10.1002/2016JD026315>, 2017.

290 May, A. A., McMeeking, G. R., Lee, T., Taylor, J. W., Craven, J. S., Burling, I., Sullivan, A. P., Akagi,  
291 S., Collett, J. L., Flynn, M., Coe, H., Urbanski, S. P., Seinfeld, J. H., Yokelson, R. J., and Kreidenweis, S.  
292 M.: Aerosol emissions from prescribed fires in the United States: A synthesis of laboratory and aircraft  
293 measurements, *J. Geophys. Res. Atmos.*, 119, 11,826–11,849, <https://doi.org/10.1002/2014JD021848>,  
294 2014.

295 May, A. A., Lee, T., McMeeking, G. R., Akagi, S., Sullivan, A. P., Urbanski, S., Yokelson, R. J., and  
296 Kreidenweis, S. M.: Observations and analysis of organic aerosol evolution in some prescribed fire smoke  
297 plumes, *Atmos. Chem. Phys.*, 15, 6323–6335, <https://doi.org/10.5194/acp-15-6323-2015>, 2015.

298 National Centers for Environmental Prediction, National Weather Service, NOAA, U. S. D. of C.: NCEP  
299 ADP Global Surface Observational Weather Data, October 1999 - continuing, 2004a.

300 National Centers for Environmental Prediction, National Weather Service, NOAA, U. S. D. of C.: NCEP  
301 ADP Global Upper Air Observational Weather Data, October 1999 - continuing, 2004b.

302 Palm, B. B., Peng, Q., Fredrickson, C. D., Lee, B. H., Garofalo, L. A., Pothier, M. A., Kreidenweis, S.  
303 M., Farmer, D. K., Pokhrel, R. P., Shen, Y., Murphy, S. M., Permar, W., Hu, L., Campos, T. L., Hall, S.  
304 R., Ullmann, K., Zhang, X., Flocke, F., Fischer, E. V., and Thornton, J. A.: Quantification of organic  
305 aerosol and brown carbon evolution in fresh wildfire plumes, *Proc. Natl. Acad. Sci.*, 117, 29469–29477,  
306 <https://doi.org/10.1073/pnas.2012218117>, 2020.

307 Sinha, P., Hobbs, P. V., Yokelson, R. J., Bertschi, I. T., Blake, D. R., Simpson, I. J., Gao, S., Kirchstetter,  
308 T. W., and Novakov, T.: Emissions of trace gases and particles from savanna fires in southern Africa, *J.*  
309 *Geophys. Res. Atmos.*, 108, <https://doi.org/10.1029/2002JD002325>, 2003.

310 Yokelson, R. J., Crouse, J. D., DeCarlo, P. F., Karl, T., Urbanski, S., Atlas, E., Campos, T., Shinozuka,  
311 Y., Kapustin, V., Clarke, A. D., Weinheimer, A., Knapp, D. J., Montzka, D. D., Holloway, J., Weibring,  
312 P., Flocke, F., Zheng, W., Toohey, D., Wennberg, P. O., Wiedinmyer, C., Mauldin, L., Fried, A., Richter,  
313 D., Walega, J., Jimenez, J. L., Adachi, K., Buseck, P. R., Hall, S. R., and Shetter, R.: Emissions from  
314 biomass burning in the Yucatan, *Atmos. Chem. Phys.*, 9, 5785–5812, [https://doi.org/10.5194/acp-9-5785-](https://doi.org/10.5194/acp-9-5785-2009)  
315 2009, 2009.

316 Yokelson, R. J., Burling, I. R., Urbanski, S. P., Atlas, E. L., Adachi, K., Buseck, P. R., Wiedinmyer, C.,  
317 Akagi, S. K., Toohey, D. W., and Wold, C. E.: Trace gas and particle emissions from open biomass  
318 burning in Mexico, *Atmos. Chem. Phys.*, 11, 6787–6808, <https://doi.org/10.5194/acp-11-6787-2011>,  
319 2011.

320
